# Supplementary material for: Impact of Xpert MTB/RIF implementation in tuberculosis case detection and control in Brazil: a nationwide intervention time-series analysis (2011–2022)
Source: PubMed Central journal article supplement — Lancet Reg Health Am. 2024 Jun 5;36:100804. doi: 10.1016/j.lana.2024.100804 (PMC11192787; doi:10.1016/j.lana.2024.100804), 2024-06-05
Supplement: mmc1.pdf [file mmc1.pdf]

|    |                                 |
|----|---------------------------------|
| 1  | <b>Supplementary Material</b>   |
| 2  | <b>Content:</b>                 |
| 3  | <b>Supplementary Methods</b>    |
| 4  | <b>Supplementary Table 1</b>    |
| 5  | <b>Supplementary Table 2</b>    |
| 6  | <b>Supplementary Table 3</b>    |
| 7  | <b>Supplementary Table 4</b>    |
| 8  | <b>Supplementary Table 5</b>    |
| 9  | <b>Supplementary Table 6</b>    |
| 10 | <b>Supplementary Table 7</b>    |
| 11 | <b>Supplementary Figure 1</b>   |
| 12 | <b>Supplementary Figure 2</b>   |
| 13 | <b>Supplementary Figure 3</b>   |
| 14 | <b>Supplementary Figure 4</b>   |
| 15 | <b>Supplementary References</b> |

## 16 **Supplementary Methods:**

### 17 **Laboratory Diagnosis of the TB Cases**

18 The laboratory diagnostic algorithm for suspected TB cases involves several tests and is composed of  
19 the following steps: (I) Sample Collection: Clinical samples are collected, preserved, and transported to the  
20 designated laboratory for further analysis; (II) RMT-TB or Microscopy: The initial diagnosis is preferably  
21 performed using the Xpert MTB/RIF. If unavailable, smear microscopy can be used as an alternative. (III) MTB  
22 Culture: Samples processed for RMT-TB, with a positive result, or microscopy, regardless of the results, undergo  
23 culture to facilitate the growth of mycobacteria. In addition, culture is also recommended for treatment monitoring  
24 in cases with positive microscopy in the second month, for children, individuals living with HIV, extrapulmonary  
25 TB, retreatment cases regardless of TRM-TB results, and suspected drug resistance, treatment failure, or non-  
26 tuberculous mycobacteria (MNT) infection; (IV) Preliminary Species Identification and First-Line DS Test: If the  
27 culture yields positive results, the sample is subjected to preliminary species identification. If it belongs to the  
28 MTB complex, first-line phenotypic DS testing is conducted to determine the appropriate treatment regimen<sup>1</sup>.

### 29 **Anomaly detection test:**

30 The *tsoutliers* package from R version 4.3.1 was used following the procedure proposed by Chen & Liu  
31 et al. (1993) for automatic anomaly detection in a time-series that identifies significant shifts in our time-series  
32 data that could indicate the impact of the intervention<sup>2,3</sup>. This method is particularly suited for detecting points  
33 where there are significant and sudden changes that cause large fluctuations in the data, classified as anomalies.  
34 We chose this method for its robustness in identifying meaningful changes in time-series data, crucial for  
35 accurately pinpointing intervention impacts. The test specifically looks for three types of anomalies: Level Shift,  
36 Additive Outlier, and Temporary Change. A Level Shift indicates a sudden and permanent change in the series  
37 level, suggesting an intervention or structural break. While Additive Outliers represent sudden spikes or drops in  
38 the series and Temporary Changes denote short-term deviations that revert to the original pattern in later  
39 observations<sup>4,5</sup>. The package also provided information on the year, estimated coefficient value, and t-statistic for  
40 each detected anomaly, as well as determining the anomaly type. P-values were calculated based on the model's  
41 t-statistic and degrees of freedom, with significance set at  $p < 0.05$ .

### 42 **Intervention time-series analysis**

43 Next, the calendar year classified as the anomaly with highest impact on the model was denoted as the  
44 intervention year, which we used to segment the time series into pre- and post-intervention phases. Afterwards,  
45 different forecasting models were employed to identify patterns and create a forecasting algorithm to predict the  
46 counterfactual values of the time-series under the assumption that the intervention had not occurred. Given the  
47 constraints posed by the limited size of our dataset, we selected two prominent models highlighted by Cruz-Nájera  
48 et al's study for accurately forecasting short-sized time-series data: ARIMA (AutoRegressive Integrated Moving  
49 Average) and ForecastHybrid and models.

50 The ARIMA modelling was performed using the 'auto.arima' function from the *forecast* package in R  
51 version 4.3.1<sup>6,7</sup>. This function automates the process of identifying the most suitable ARIMA model for a given  
52 time series. It performs this by conducting a detailed search over possible model specifications and the selecting  
53 the ARIMA formula that minimizes the AICc (Corrected Akaike Information Criterion) value. The AICc is a  
54 measure used to compare the goodness-of-fit of different models while adjusting for sample size. The formula for  
55 the ARIMA model is represented as ARIMA(p,d,q)(P,D,Q)[s], where: where p and P are the orders of the  
56 autoregressive components, d and D are the others of differencing, q and Q are the orders of the moving average  
57 component, and s checks for a possible seasonal period in the time-series<sup>6,7</sup>. Importantly, when the model identifies

58 the absence of a significant trend, seasonality, or sufficient temporal dynamics in the data, the formula can be  
59 represented as ARIMA (0,0,0). This model, indicative of a random walk, projects future values to equal the last  
60 observed value, yielding a flat forecast with prediction intervals widening over time to reflect increasing  
61 uncertainty. By evaluating the AICc value in different combinations of these parameters, the function determines  
62 the most accurate possible model and ensures that the chosen model is well-suited for the data<sup>6,7</sup>.

63 On the other hand, the ForecastHybrid model combines the strengths of multiple forecasting techniques,  
64 including ARIMA<sup>7</sup>, Exponential Smoothing State Space Models (ETS)<sup>8</sup>, TBATS<sup>9</sup> and the Theta Model<sup>10</sup>, to  
65 enhance prediction accuracy. To do this, the *forecastHybrid* R package<sup>11</sup> automatically combines the forecast  
66 results of each model by either assigning an equal weight to each model or determining the weighting based on  
67 in-sample accuracy measures such as Mean Absolute Error (MAE), Mean Absolute Scaled Error (MASE) or Root-  
68 Mean-Square Error (RMSE). Due to the small-size of our time-series, the feed-forward neural network model  
69 (nnetar) was excluded from the ForecastHybrid modelling.

70 To ensure a rigorous evaluation of our models, we partitioned our data into two distinct sets. Observations  
71 from the pre-intervention phase served as our in-sample testing data, providing the foundation upon which our  
72 models were trained and fitted. In contrast, data from the post-intervention phase was reserved as a test set,  
73 allowing us to assess the models' predictive capabilities in real-world, out-of-sample scenarios. Therefore, to select  
74 the model with highest accuracy we used the Mean Absolute Percentage Error (MAPE) calculated using the out-  
75 sample data. MAPE is a measure that captures the average discrepancy between observed and forecasted values,  
76 expressed as a percentage<sup>7</sup>. Upon evaluating the models, those with the lowest MAPEs were chosen as our primary  
77 forecasting tools to predict the counterfactual values. The detailed accuracy results for all models, including those  
78 not selected, are reported in Supplementary Table 2.

79 Of note, for the phenotypic DS testing model, our analysis revealed a Level Shift in 2013, which we  
80 attribute to the launch of the Site-TB platform for special treatment TB case notifications<sup>12</sup>. Interestingly, while  
81 an additive outlier was detected in 2014, suggesting the initial impact of Xpert, the most significant anomaly was  
82 identified in 2015, aligning with the Xpert implementation. Given these findings, we reasoned that selecting 2015  
83 as the intervention year might not accurately capture the pre-Xpert scenario, as ITSA influence seemingly began  
84 in 2014. Thus, to better represent the scenario without Xpert's influence and to account for the potential early  
85 impact of Xpert in 2014, we designated 2014 as the intervention year for this model.

## 86 **Todo-Yamamoto Procedure for Granger Causality**

87 To determine if observations from Xpert MTB/RIF testing could be used to improve prediction models  
88 of the future values in our time-series models depicting yearly TB and DR-TB case notification and testing, we  
89 used the concept of Granger Causality. Granger Causality is a statistical hypothesis test that evaluates whether  
90 past values of one time series can provide information that aids in predicting another time series<sup>13,14</sup>. For example,  
91 if time series X's historical values improve the predictability of time series Y beyond Y's past values alone, X is  
92 deemed to "Granger-cause" Y, which is represented by a p value lower than 0.05<sup>14</sup>. Furthermore, given the non-  
93 stationary nature of our time-series models, as confirmed by the Augmented Dickey–Fuller test, we adopted the  
94 Toda-Yamamoto procedure tailored for bivariate Granger Causality tests on non-stationary data<sup>15</sup>. To perform  
95 this procedure adhered to the following steps: (1) The maximal order of integration (d) was determined for all  
96 series using Augmented Dickey-Fuller (ADF) unit root tests<sup>34</sup>. (2) Constructing six vector autoregressive model  
97 (VAR) models, each incorporating the Xpert MTB/RIF testing coverage and one of the time-series data sets. The

98 Akaike information criterion (AIC) determined the optimal lag order (k) for these VAR models. (3) To ensure the  
99 robustness of our VAR models, we examined residual serial correlation with the Lagrange multiplier (LM)-test.  
100 (4) A Granger causality test was conducted on a new augmented VAR model, which incorporated the sum of the  
101 maximal order of integration and optimal lag order  $(k + d)^{15}$ .

## 102 **Dynamic Regression Forecast Models**

103 In order to perform the dynamic regression forecast models, our methodology hinged once again on the  
104 two primary models highlighted by Cruz-Nájera et al 2022: the ARIMA with external regressors (ARIMAX) and  
105 the ForecastHybrid models with external regressors<sup>16</sup>. In addition to fitting these models with external regressions,  
106 we also create univariate models for each time-series data and compared their out-of-sample accuracy to the  
107 dynamic regression versions. To do this, we segmented the time-series into training data (in-sample: 2011-2020)  
108 and test data (out-of-sample: from 2021-2022). The model boasting the lowest MAPE for each outcome time-  
109 series was then chosen for a 6-year forecast. For those time-series where the dynamic regression model with  
110 external regressors emerged superior, we incorporated historical Xpert MTB-RIF testing data from 2019-2022  
111 and forecasted data for 2023-2024. Through this approach, we could validate the results of the Granger Causality  
112 test on whether Xpert MTB/RIF annual testing values can be used to better predict the future values of each  
113 outcome variable, as well as forecasts of a possible scenario on the next 6-years of TB and DR-TB notification in  
114 Brazil. However, it is critical to acknowledge that to more accurately project the future burden of TB, given its  
115 complex and multifactorial nature, necessitates the consideration of a broad array of determinants. These include  
116 comorbidities, transmission dynamics, socio-epidemiological influences, and preventative measures, each playing  
117 a role in shaping the prevalence of TB.

118 Moreover, after producing the 6-year forecasts for each time-series data, we also performed a Mann-  
119 Kendall (MK) test to perceive statistically significant decreasing or increasing trends on our data. To do this, we  
120 sectioned each time-series into two datasets, one including only data from the historical values and another with  
121 both the historical and forecasted values. In addition, Sen's slope estimates, including linear rate of change and  
122 95% confidence levels, were calculated to determine the magnitude of the trend in our temporal data, quantifying  
123 the time change. A significant advantage of the Sen's Slope estimator is its resistance to outliers in the data, thus  
124 fitting well with the nature of our time-series data.

## 125 **Notification of TB cases**

126 Confirmation of TB cases, whether by laboratory analysis or clinical evaluation, is a prerequisite for notification;  
127 (II) Notification: Healthcare professionals are responsible for notifying SINAN-TB about all TB cases, which  
128 includes the submission of detailed clinical and epidemiological information about the patient, including which  
129 tests were used for diagnosis, as well as their results; (III) Treatment Accessibility: The Unified Health System  
130 (Sistema Único de Saúde - SUS) ensures that TB treatment is accessible nationwide at no cost. The standard  
131 treatment for DS-TB usually consists of a two-month intensive phase with four drugs (Isoniazid, Rifampicin,  
132 Pyrazinamide, and Ethambutol), followed by a continuation phase of at least four months with Isoniazid and  
133 Rifampicin. Treatment for DR-TB varies according to resistance type; (IV) Update Notification: data on the  
134 treatment outcome is mandatorily updated in SINAN-TB9.

135 **Supplementary Table 1. Packages used for the statistical analyses.**

| <b>Type of Analysis</b>                 | <b>R package</b>        | <b>Version</b> | <b>Reference</b> |
|-----------------------------------------|-------------------------|----------------|------------------|
| Anomaly Detection Test                  | tsOutliers <sup>5</sup> | <b>8·21.1</b>  | 5                |
| Intervention Time-Series - ARIMA Model  | Forecast <sup>17</sup>  | <b>8·21.1</b>  | 17               |
| Intervention Time-Series - Hybrid Model | Forecast <sup>17</sup>  | <b>5·0.19</b>  | 17               |
| Plot graphs                             | ggplot <sup>18</sup>    | <b>3·4·4</b>   | 18               |
| Cross-Correlation Function              | stats <sup>19</sup>     | <b>4·3.1</b>   | 19               |
| Spearman Correlation                    | pspearman <sup>20</sup> | <b>0·3.1</b>   | 20               |
| Granger Causality Test                  | vars <sup>21</sup>      | <b>1·5·9</b>   | 21               |
| Geographical Distribution               | geobr <sup>22</sup>     | <b>1·8.1</b>   | 22               |

136

137

| <b>Time-Series Data</b> | <b>Anomaly Type</b> | <b>Anomaly Detection Year</b> | <b>Anomaly Estimated Coefficient</b> | <b>t-Statistic</b> | <b>p-value</b>    |
|-------------------------|---------------------|-------------------------------|--------------------------------------|--------------------|-------------------|
| Total TB Cases          | LS                  | 2017                          | 8435.00                              | 5.83               | <b>&lt; 0.001</b> |
| DR-TB Cases             | LS                  | 2014                          | 908.33                               | 5.96               | <b>&lt; 0.001</b> |
| DS-TB Cases             | LS                  | 2014                          | 15028.33                             | 6.45               | <b>&lt; 0.001</b> |
| Phenotypic DS Test      | LS                  | 2015                          | 5887.00                              | 14.64              | <b>&lt; 0.001</b> |
| MTB Culture Test        | LS                  | 2015                          | 3190.11                              | 70.18              | <b>&lt; 0.001</b> |
| Smear Microscopy Test   | LS                  | 2015                          | -3732.74                             | -44.17             | <b>&lt; 0.001</b> |

139 **Table note: Data represents results of anomaly detection test on all time-series included in the analysis.** The  
140 anomaly Type indicates the type of anomaly detected, the test specifically searched for three types of anomaly:  
141 Level Shifts, Additive Outliers, and Temporary Changes. The "**Anomaly** Detection Year" column specifies the  
142 year in which the impact initiated. Anomaly Estimated Coefficient represents the estimated coefficient for the  
143 anomaly, indicating ITSA magnitude. The "t-Statistic" column displays the calculated t-statistic value for the  
144 anomaly, which assesses the significance of ITSA effect. P-values lower than 0.05 were considered significant  
145 and are outlined in bold. Notably, all anomalies detected in this analysis demonstrated a significant impact.

146 **Abbreviations:** LS: Level Shift; TB: Tuberculosis, DR-TB: Drug-resistant tuberculosis; DS-TB: Drug-sensitivity  
147 tuberculosis; DS: Drug-sensitivity; MTB: *Mycobacterium tuberculosis*.

148  
149  
150  
151  
152  
153  
154  
155  
156

57 **Supplementary Table 3. Accuracy Measures of different forecasting models for ITSA analysis**

| Time-Series Data         | Forecast                 | ARIMA Model  | Hybrid Model - | Hybrid Model - | Hybrid Model - | Hybrid Model - |
|--------------------------|--------------------------|--------------|----------------|----------------|----------------|----------------|
|                          | Accuracy Measures        |              | Equal Weights  | MASE Weights   | MAE Weights    | RMSE Weights   |
| <b>Total TB Cases</b>    | In-sample - MAPE (%)     | <b>0·79%</b> | 6·70%          | 6·60%          | 6·60%          | 6·50%          |
|                          | Out-of-sample - MAPE (%) | <b>9·55%</b> | 9·99%          | 10·13%         | 10·13%         | 10·19%         |
|                          | Best Model               | ✓            | -              | -              | -              | -              |
| <b>Total DR-TB Cases</b> | In-sample - MAPE (%)     | 9·22         | 5·28           | 1·87           | 1·87           | <b>1·72</b>    |
|                          | Out-of-sample - MAPE (%) | 74·25        | 65·63          | 62·27          | 62·27          | <b>62·13</b>   |
|                          | Best Model               | -            | -              | -              | -              | ✓              |
| <b>Total DS-TB Cases</b> | In-sample - MAPE (%)     | 24·80        | 24·49          | 24·47          | <b>24·47</b>   | 24·50          |
|                          | Out-of-sample - MAPE     | 89·86        | 89·54          | 89·51          | <b>89·51</b>   | 89·56          |
|                          | Best Model               | -            | -              | -              | ✓              | -              |
| <b>Phenotypic DS</b>     |                          |              |                |                |                |                |
| <b>Testing</b>           | In-sample - MAPE (%)     | 29·32        | 14·80          | 11·31          | 11·31          | <b>11·33</b>   |
|                          | Out-of-sample - MAPE (%) | 72·43        | 50·65          | 44·92          | 44·92          | <b>44·75</b>   |
|                          | Best Model               | -            | -              | -              | -              | ✓              |
| <b>MTB Culture</b>       |                          |              |                |                |                |                |
| <b>Testing</b>           | In-sample - MAPE (%)     | 1·93         | <b>1·90</b>    | 1·89           | 1·89           | 1·91           |
|                          | Out-of-sample - MAPE (%) | 18·82        | <b>17·28</b>   | 17·48          | 17·48          | 17·42          |
|                          | Best Model               | -            | ✓              | -              | -              | -              |
| <b>Smear Microscopy</b>  |                          |              |                |                |                |                |
| <b>Testing</b>           | In-sample - MAPE (%)     | 1·27         | <b>1·31</b>    | 1·31           | 1·31           | 1·31           |
|                          | Out-of-sample - MAPE (%) | 7·58         | <b>6·75</b>    | 6·77           | 6·77           | 6·85           |
|                          | Best Model               | -            | ✓              | -              | -              | -              |

58 **Table note:** Data represents MAPE accuracy values of all tested time-series models, and the best chosen to perform the forecast. The “In-sample - MAPE” row represents the accuracy  
59 measures calculated based on the observed historical used to construct the model, while the " Out-of-sample - MAPE" row presents the accuracy measure estimated on the un-seen data  
60 not included in the model creation process. Accuracy measures for the ARIMA modelling technique, in addition to different variations of the Forecast Hybrid model were included.

51 **Abbreviations:** TB: Tuberculosis, DR-TB: Drug-resistant tuberculosis; DS-TB: Drug-susceptible tuberculosis; MTB: *Mycobacterium tuberculosis*, ARIMA: Autoregressive Integrated  
52 Moving Average, MASE: Mean Absolute Squared Error, MAE: Mean Absolute Error, RMSE: Root Mean Squared Error, MAPE: Mean Absolute Percentage Error.

53



64

**Supplementary Table 4. Assessment of Forecasting Model Accuracy Using In-Sample and Out-of-Sample MAPE**

| Time-Series Data                        | Best Model<br>(Without External<br>Regressor) | In-sample<br>MAPE Value | Out-of-sample<br>MAPE Value | Best Model<br>(With External Regressor) | In-sample<br>MAPE Value | Out-of-sample<br>MAPE Value | Overall Best<br>Model      |
|-----------------------------------------|-----------------------------------------------|-------------------------|-----------------------------|-----------------------------------------|-------------------------|-----------------------------|----------------------------|
| <b>Total TB Cases</b>                   | ARIMA                                         | 3.03%                   | 10.19%                      | Hybrid (Equal Weights)                  | 3.09%                   | <b>4.71%</b>                | With External<br>Regressor |
| <b>Total DR-TB<br/>Cases</b>            | Hybrid (Equal Weights)                        | 16.37%                  | 17.13%                      | Hybrid (RMSE Weights)                   | 18.14%                  | <b>6.10%</b>                | With External<br>Regressor |
| <b>Total DS-TB<br/>Cases</b>            | ARIMA                                         | 63.38%                  | 3.36%                       | Hybrid (RMSE Weights)                   | 27.48%                  | <b>2.08%</b>                | With External<br>Regressor |
| <b>Phenotypic DS<br/>Testing</b>        | Hybrid (Equal Weights)                        | 21.57%                  | <b>3.51%</b>                | Hybrid (Equal Weights)                  | 23.57%                  | 6.89%                       | No External<br>Regressor   |
| <b>MTB Culture<br/>Testing</b>          | Hybrid (MASE Weights)                         | 4.68%                   | 10.80%                      | ARIMA                                   | 3.19%                   | <b>9.02%</b>                | With External<br>Regressor |
| <b>Smear<br/>Microscopy<br/>Testing</b> | Hybrid (RMSE Weights)                         | 2.95%                   | 10.69%                      | ARIMA                                   | 2.88%                   | <b>6.80%</b>                | With External<br>Regressor |

65

**Table note:** This table showcases the comparative performance of primary models used for the forecast analysis using MAPE accuracy values calculated for both in-sample (2011-2020) and out-of-sample (2021-2022) data sets. Models were evaluated based on their out-of-sample MAPE values, with the lowest MAPE indicating optimal performance. Dynamic regression model with external regressors incorporated historical Xpert MTB-RIF testing data from 2011-2019 in their construction, while univariate models did not include external regressors and relied solely on historical data from the outcome series. The models with lowest MAPE values in each category were compared in table, with the most accurate model being chosen for the 6-year forecasts.

70

71

72

73

74

75

76 **Supplementary Table 5. Correlation and Causality Analysis Between Xpert MTB-RIF Testing and**  
77 **Anomaly Time-Series Data (Spearman Correlation)**

| Time-Series Data         | Spearman-Correlation |                   |
|--------------------------|----------------------|-------------------|
| Target                   | rho                  | p-value           |
| Total TB Cases           | 0.75                 | <b>0.007</b>      |
| DR-TB Cases              | 0.89                 | <b>&lt; 0.001</b> |
| DS-TB Cases              | 0.82                 | <b>0.003</b>      |
| Phenotypic DS Testing    | 0.95                 | <b>&lt; 0.001</b> |
| MTB Culture Testing      | 0.89                 | <b>&lt; 0.001</b> |
| Smear Microscopy Testing | -0.63                | <b>0.033</b>      |

78 **Table note:** This table represents results from three analyses: Spearman's rank correlation test, Cross-Correlation Function,  
79 and Toda-Yamamoto Procedure for Granger Causality. For Spearman's rank correlation, we reported both Spearman's rho  
80 and the associated p-value calculated using exact null distribution. In the Cross-Correlation analysis, we showed the  
81 correlation coefficients and the respective lag of highest correlation. All displayed cross-correlation coefficients were deemed  
82 significant based on ACF plots with a p-value less than 0.05. The Granger Causality analysis employed the Toda-Yamamoto  
83 procedure, presenting both the F-statistic and p-values. P-values lower than 0.05 are considered statistically significant and  
84 are highlighted in bold.

Supplementary Table 6. Regional Analysis of TB and DR-TB Testing and Notification Case Counts in Brazil

| Characteristics                   | North<br>(n = 118,438) | Northeast<br>(n = 281,539) | Midwest<br>(n = 51,523) | Southeast<br>(n = 476,772) | South<br>(n = 133,500) |
|-----------------------------------|------------------------|----------------------------|-------------------------|----------------------------|------------------------|
| <b>Xpert MTB/RIF testing</b>      |                        |                            |                         |                            |                        |
| No. of Cases                      | 31637                  | 54077                      | 11596                   | 129596                     | 29589                  |
| Pop. Density per 100 cases        | 34                     | 26                         | 30                      | 36                         | 29                     |
| <b>Total TB Cases (2014-2022)</b> | 92905                  | 211804                     | 39122                   | 362595                     | 100329                 |
| <b>Total DR-TB Cases</b>          |                        |                            |                         |                            |                        |
| No. of Cases                      | 1435                   | 2998                       | 659                     | 7641                       | 2566                   |
| Pop. Density per 100 cases        | 1.21                   | 1.06                       | 1.28                    | 1.60                       | 1.92                   |
| <b>Total DS-TB Cases</b>          |                        |                            |                         |                            |                        |
| No. of Cases                      | 24742                  | 42726                      | 9706                    | 130475                     | 27921                  |
| Pop. Density per 100 cases        | 21                     | 15                         | 19                      | 27                         | 21                     |
| <b>Phenotypic DS testing</b>      |                        |                            |                         |                            |                        |
| No. of Cases                      | 7475                   | 11470                      | 4799                    | 81036                      | 15589                  |
| Pop. Density per 100 cases        | 6                      | 4                          | 9                       | 17                         | 12                     |
| <b>MTB Culture testing</b>        |                        |                            |                         |                            |                        |
| No. of Cases                      | 33580                  | 61727                      | 17792                   | 187354                     | 53701                  |
| Pop. Density per 100 cases        | 28                     | 22                         | 35                      | 39                         | 40                     |
| <b>Smear microscopy testing</b>   |                        |                            |                         |                            |                        |
| No. of Cases                      | 90356                  | 196573                     | 35330                   | 342295                     | 97382                  |
| Pop. Density per 100 cases        | 76                     | 70                         | 69                      | 72                         | 73                     |

**Table Note:** Regional analysis of TB and DR-TB testing and notification case counts in Brazil. The table includes the total TB cases notified for each region, as well as the number of cases and population density per 100 cases for various testing and notification categories, which indicates the number of notified cases for each testing category per 100 TB cases in each region. For Xpert MTB/RIF testing, data from 2014-2022 post-implementation is analysed, contrasting with other testing categories that consider data from 2011-2022 to include pre-implementation trends. The Total TB cases from 2014-2022 row is highlighted to emphasize its reference value. **Abbreviations:** MTB: *Mycobacterium tuberculosis*; TB: Tuberculosis, Pop: Population; 'n': the total TB cases notified for each region

08

### Supplementary Table 7. Drug-Sensitivity Status of Total TB-Infected Population

| Characteristics                       | Total TB-Infected Population<br>(n = 1061776) |
|---------------------------------------|-----------------------------------------------|
| <b>MTB-Sensitivity Status, n (%):</b> |                                               |
| Known                                 | 250869 (23.6%)                                |
| Unknown                               | 810907 (76.4%)                                |

09

**Table note:** This table depicts the proportion of the total TB population with known and unknown drug-sensitivity results, with 24% of cases having known drug-sensitivity results. Abbreviations: **MTB:** Mycobacterium tuberculosis; **TB:** Tuberculosis.

12

13

14

15

16

17

18 **Supplementary Table 8. Drug-Sensitivity Status of Total TB-Infected Population**

| Characteristics                            | Total DR-TB Cases<br>(n = 15299) | Total DS-TB Cases<br>(n = 235570) |
|--------------------------------------------|----------------------------------|-----------------------------------|
| <b>Resistance Screening Method, n (%):</b> |                                  |                                   |
| Phenotypic DST                             | 8422 (55.0%)                     | 40741 (17.3%)                     |
| Xpert MTB/RIF                              | 4954 (32.4%)                     | 134621 (57.1%)                    |
| Both methods                               | 1923(12.6%)                      | 60208 (25.6%)                     |

19 **Table note:** This table provides a detailed breakdown of TB cases with known sensitivity results, further categorized into  
20 Drug-Resistant TB (DR-TB) and Drug-Susceptible TB (DS-TB), with the respective detection methods used, including solely  
21 Phenotypic DS test or Xpert MTB/RIF, and cases detected by both tests. **Abbreviations:** **TB:** Tuberculosis; **DR-TB:** Drug-  
22 resistant Tuberculosis; **DS-TB:** Drug-susceptible Tuberculosis; **DST:** Drug-Sensitivity Test.

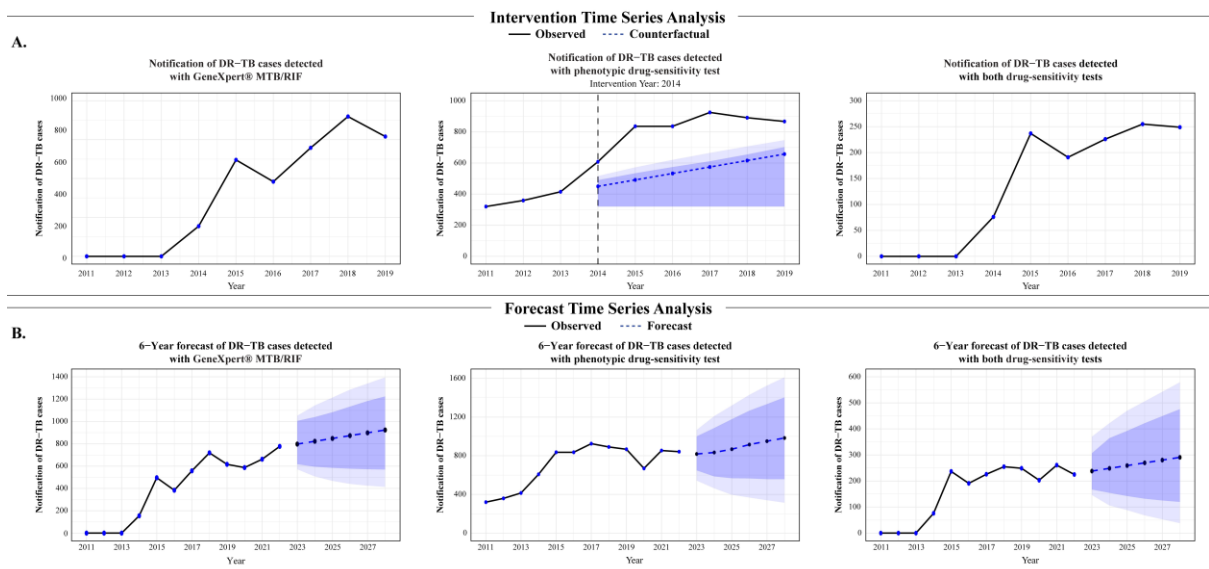

246  
247  
248  
249  
250  
251  
252  
253  
254  
255  
256  
257  
258  
259  
260  
261  
262  
263  
264  
265  
266  
267  
268  
269  
270  
271  
272

**Supplementary Figure 1. Time-series analysis on DR-TB case notification categorized based on the resistance detection method.** Firstly, the impact of Xpert implementation on the notification of DR-TB cases solely diagnosed via the phenotypic method, and as well as the reporting rate of cases exclusively identified solely through genotypic (Xpert) method and those diagnosed by both approaches are displayed in **Supplementary Figure 1A**. Secondly, the forecasted values are displayed from 2023-2028 in **Supplementary Figure 1B**.  
**Abbreviations:** TB: Tuberculosis; DR-TB: Drug-resistant Tuberculosis.

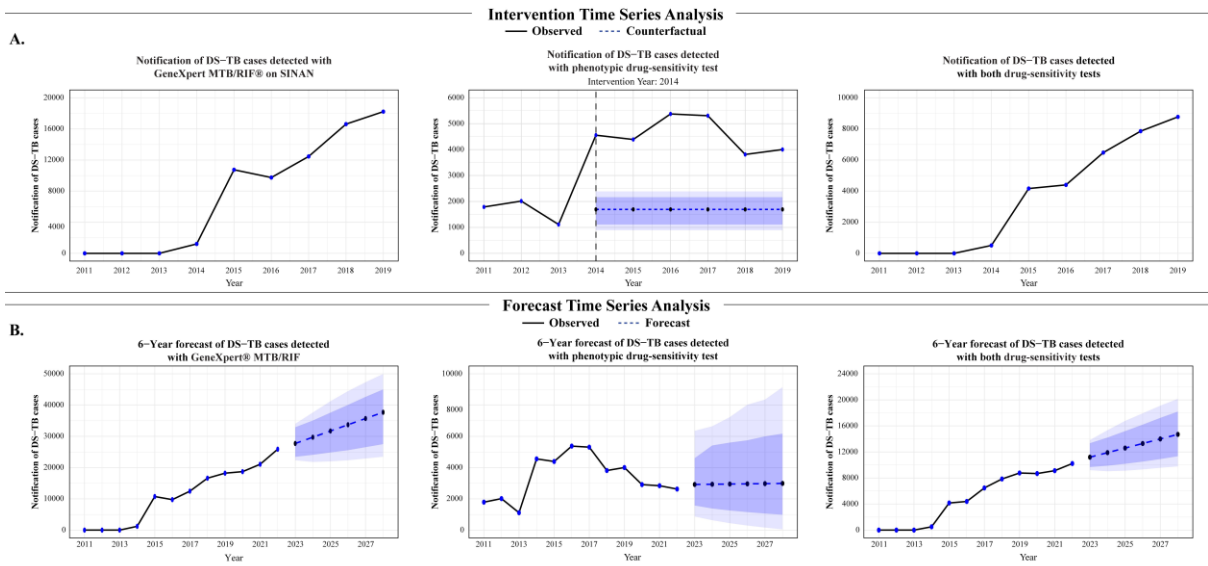

273  
274  
275  
276  
277  
278  
279  
280

**Supplementary Figure 2. Time-series analysis on DS-TB case notification categorized based on the resistance detection method.** Firstly, the impact of Xpert implementation on the notification of DS -TB cases solely diagnosed via the phenotypic method, and as well as the reporting rate of cases exclusively identified solely through genotypic (Xpert) method and those diagnosed by both approaches are displayed in **Supplementary Figure 2A**. Secondly, the forecasted values are displayed from 2023-2028 in **Supplementary Figure 2B**.  
**Abbreviations:** TB: Tuberculosis; DS -TB: Drug-susceptible Tuberculosis.

## GeneXpert MTB/RIF Time Series

— Observed    - - - Forecast

### 2-Year forecast of GeneXpert MTB/RIF testing in SINAN

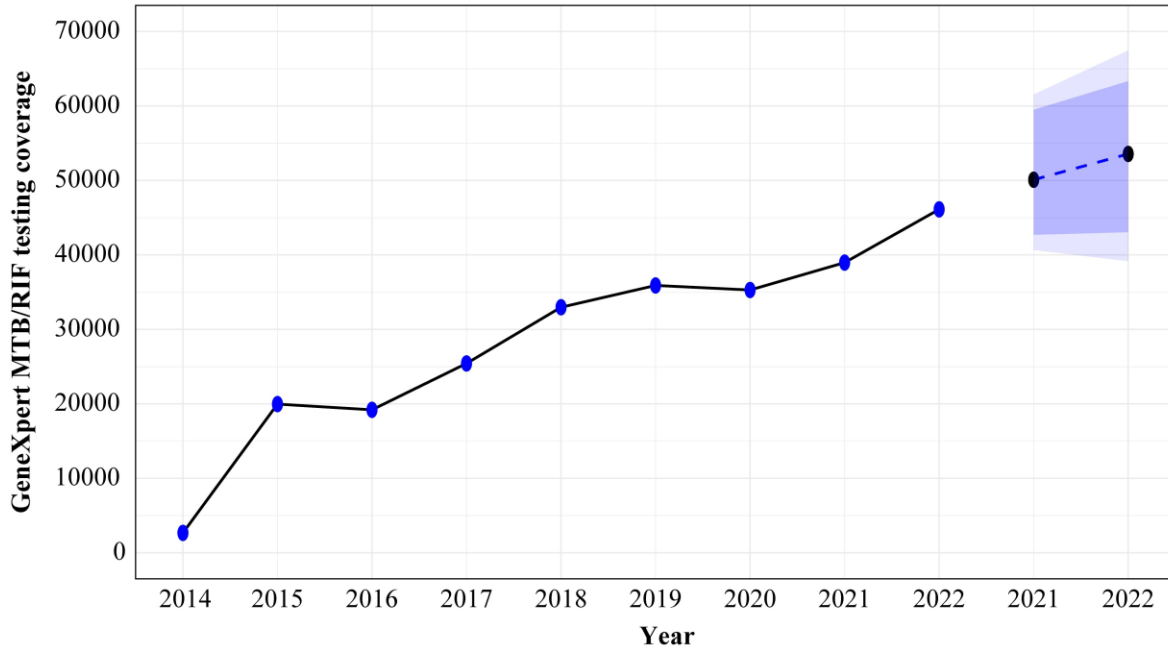

281

282 **Supplementary Figure 3. 2-Year Forecast of Xpert MTB/RIF testing coverage on SINAN.** This figure

283 represents a 2-year forecast of annual Xpert testing with an out-of-sample MAPE accuracy measure of 5.04%.

284 Prediction intervals are presented at two confidence levels: 80% and 95%. These intervals are visually

285 differentiated by two distinct shades of blue, with the lighter shade representing the broader 95% interval.

286

287



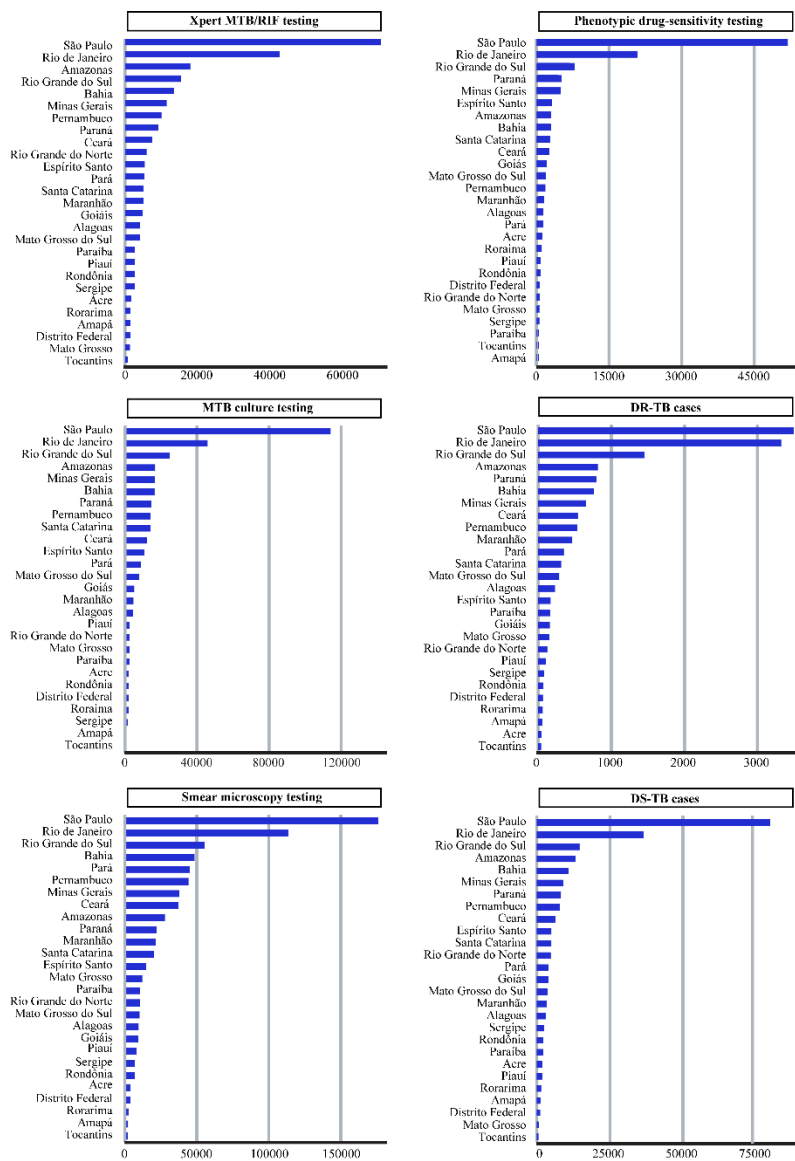

288  
 289  
 290  
 291  
 292  
 293  
 294  
 295  
 296  
 297

**Supplementary Figure 4. Bar graphs depicting the TB and DR-TB case notification and diagnostic testing coverage stratified by state.** The figure represents the total number of notified numbers of TB cases, DR-TB and DS-TB cases and, as well as testing coverage for Xpert MTB/RIF, phenotypic drug-sensitivity, MTB culture and smear microscopy testing on SINAN between 2011-2022, are depicted in blue.

**Abbreviations:** TB: Tuberculosis, DR-TB: Drug-resistant tuberculosis; DS-TB: Drug-susceptible tuberculosis, MTB: Mycobacterium tuberculosis.

299

- 300 1 Ministério da Saúde. Manual e Recomendações para o Diagnóstico Laboratorial de  
301 Tuberculose e Micobactérias não Tuberculosas de Interesse em Saúde Pública no Brasil. 2022.
- 302 2 López-de-Lacalle J. Package ‘tsoutliers’. 2019; : 1–29.
- 303 3 Chen C, Liu L-M. Joint Estimation of Model Parameters and Outlier Effects in Time Series. *J*  
304 *Am Stat Assoc* 1993; **88**: 284.
- 305 4 Tsay RS. Outliers, level shifts, and variance changes in time series. *J Forecast* 1988; **7**: 1–20.
- 306 5 Chen C, Liu L -M. Forecasting time series with outliers. *J Forecast* 1993; **12**: 13–35.
- 307 6 Hyndman R, Athanasopoulos G, Bergmeir C. Package ‘forecast’ Title Forecasting Functions  
308 for Time Series and Linear Models . 2023. [https://cran.r-](https://cran.r-project.org/web/packages/forecast/forecast.pdf)  
309 [project.org/web/packages/forecast/forecast.pdf](https://cran.r-project.org/web/packages/forecast/forecast.pdf) (accessed May 25, 2023).
- 310 7 Hyndman RJ, Athanasopoulos G. Forecasting: principles and practice, 2nd edn. Melbourne,  
311 Australia: OTexts - OTexts.com/fpp2., 2018.
- 312 8 Hyndman R, Koehler A, Ord K, Snyder R. Forecasting with Exponential Smoothing. 2008.  
313 DOI:10.1007/978-3-540-71918-2.
- 314 9 de Livera AM, Hyndman RJ, Snyder RD. Forecasting Time Series With Complex Seasonal  
315 Patterns Using Exponential Smoothing. *J Am Stat Assoc* 2011; **106**: 1513–27.
- 316 10 Assimakopoulos V, Nikolopoulos K. The theta model: a decomposition approach to  
317 forecasting. *Int J Forecast* 2000; **16**: 521–30.
- 318 11 Using the ‘forecastHybrid’ package. [https://cran.r-](https://cran.r-project.org/web/packages/forecastHybrid/vignettes/forecastHybrid.html)  
319 [project.org/web/packages/forecastHybrid/vignettes/forecastHybrid.html](https://cran.r-project.org/web/packages/forecastHybrid/vignettes/forecastHybrid.html) (accessed Sept 30,  
320 2023).
- 321 12 Bartholomay P, Pinheiro RS, Pelissari DM, *et al.* Sistema de Informação de Tratamentos  
322 Especiais de Tuberculose (SITE-TB): histórico, descrição e perspectivas. *Epidemiologia e*  
323 *Serviços de Saúde* 2019; **28**: e2018158.
- 324 13 Granger CWJ. Investigating Causal Relations by Econometric Models and Cross-spectral  
325 Methods. *Econometrica* 1969; **37**: 424.
- 326 14 Lima V, Dellajustina FJ, Shimoura RO, *et al.* Granger causality in the frequency domain:  
327 derivation and applications. *Revista Brasileira de Ensino de Física* 2020; **42**: e20200007.
- 328 15 Toda HY, Yamamoto T. Statistical inference in vector autoregressions with possibly integrated  
329 processes. *J Econom* 1995; **66**: 225–50.
- 330 16 Cruz-Nájera MA, Treviño-Berrones MG, Ponce-Flores MP, *et al.* Short Time Series  
331 Forecasting: Recommended Methods and Techniques. *Symmetry* 2022, Vol 14, Page 1231  
332 2022; **14**: 1231.
- 333 17 Hyndman RJ, Khandakar Y. Automatic Time Series Forecasting: The forecast Package for R.  
334 *J Stat Softw* 2008; **27**: 1–22.
- 335 18 ggplot2: Elegant Graphics for Data Analysis (3e). <https://ggplot2-book.org/> (accessed Nov 9,  
336 2023).
- 337 19 Venables WN, Ripley BD. Modern Applied Statistics with S. 2002. DOI:10.1007/978-0-387-  
338 21706-2.
- 339 20 Savicky MP. Package ‘pspearman’. 2022.
- 340 21 Pfaff B. VAR, SVAR and SVEC Models: Implementation Within R Package vars. *J Stat Softw*  
341 2008; **27**: 1–32.
- 342 22 Official Spatial Data Sets of Brazil [R package geobr version 1.8.1]. 2023; published online  
343 Sept 21. <https://CRAN.R-project.org/package=geobr> (accessed Nov 9, 2023).
- 344
